# Supplementary material for: Genetic Association between Amyotrophic Lateral Sclerosis and Cancer
Source: Genes (Basel). 2017 Sep 27;8(10):243. doi: 10.3390/genes8100243 (PMC5664093; doi:10.3390/genes8100243)
Supplement: Supplementary file 1 [file genes-08-00243-s001.xlsx]

## Sheet: Index
Table S1	101 probes identified by PCA based unsupervised FE
Table S2	Gene symbols associated with 101 probes identified by DAVID gene ID converter
Table S3	Cancer survival probabilities identified by OncoLnc for genes in Table S2
Table S4	Genes associated with significant cancer survival probabilities
Table S5	REACTOME and TFBS enrichment by DAVID for genes in Table S4

## Sheet: S1
Table S1
1	X79510
2	M21121
3	M33318
4	L13720
5	Z48481
6	L41690
7	L00635
8	U38545
9	NM_001659
10	NM_000982
11	NM_020151
12	NM_000981
13	NM_004396
14	NM_000970
15	NM_015343
16	NM_007104
17	NM_016587
18	NM_000985
19	H15647
20	NM_001020
21	NM_002622
22	AI656493
23	NM_004730
24	NM_001129
25	NM_002727
26	NM_014888
27	AA195259
28	NM_004907
29	NM_005655
30	AI862445
31	M38083
32	NM_004863
33	NM_004219
34	NM_000300
35	NM_002250
36	NM_021076
37	NM_003579
38	NM_003226
39	AA910306
40	NM_007168
41	D14134
42	NM_002830
43	NM_012231
44	BF223679
45	NM_014897
46	AF112972
47	NM_002588
48	NM_005815
49	NM_004904
50	NM_001882
51	NM_001072
52	NM_003151
53	NM_001181
54	NM_016155
55	NM_004472
56	NM_000537
57	NM_002012
58	BC000353
59	NM_002478
60	U76376
61	NM_004285
62	NM_006065
63	NM_000390
64	NM_016333
65	NM_000726
66	AF070655
67	BC002649
68	BC001211
69	BC002571
70	U06935
71	BC001161
72	BC005220
73	D26480
74	U26266
75	AI972475
76	AI798790
77	NM_006662
78	AL117502
79	N20923
80	AL564683
81	R60068
82	AI357401
83	BF732638
84	BE674119
85	AI762113
86	N36842
87	NM_003175
88	M96739
89	BC005066
90	AK026191
91	AK021738
92	BG325734
93	AF007131
94	AU145711
95	AB051538
96	AC004857
97	NM_016404
98	NM_015153
99	NM_016086
100	NM_025213
101	AI054381

## Sheet: S2
Table S2
GENBANK_Accession	Gene symbol	Species	description
NM_025213	SPTBN4	Homo sapiens	spectrin, beta, non-erythrocytic 4
L13720	gas6	Homo sapiens	similar to growth arrest-specific 6; growth arrest-specific 6
L13720	LOC732446	Homo sapiens	similar to growth arrest-specific 6; growth arrest-specific 6
U26266	dhps	Homo sapiens	deoxyhypusine synthase
BC005066	LOC100287590	Homo sapiens	hypothetical protein LOC100287590
NM_004730	etf1	Homo sapiens	eukaryotic translation termination factor 1
AK021738	TMC6	Homo sapiens	transmembrane channel-like 6
M38083	nagA	Homo sapiens	N-acetylgalactosaminidase, alpha-
NM_001020	RPS16P10	Homo sapiens	ribosomal protein S16 pseudogene 1; ribosomal protein S16 pseudogene 10; ribosomal protein S16
NM_001020	RPS16P1	Homo sapiens	ribosomal protein S16 pseudogene 1; ribosomal protein S16 pseudogene 10; ribosomal protein S16
NM_001020	rps16	Homo sapiens	ribosomal protein S16 pseudogene 1; ribosomal protein S16 pseudogene 10; ribosomal protein S16
NM_020151	STARD7	Homo sapiens	StAR-related lipid transfer (START) domain containing 7
NM_005815	ZNF443	Homo sapiens	zinc finger protein 443
NM_016333	SRRM2	Homo sapiens	serine/arginine repetitive matrix 2; hypothetical LOC100132779
NM_016333	LOC100132779	Homo sapiens	serine/arginine repetitive matrix 2; hypothetical LOC100132779
NM_002250	KCNN4	Homo sapiens	potassium intermediate/small conductance calcium-activated channel, subfamily N, member 4
AK026191	ddah2	Homo sapiens	dimethylarginine dimethylaminohydrolase 2
NM_003579	RAD54L	Homo sapiens	RAD54-like (S. cerevisiae)
NM_002588	PCDHGA12	Homo sapiens	protocadherin gamma subfamily C, 3; protocadherin gamma subfamily C, 5; protocadherin gamma subfamily C, 4; protocadherin gamma subfamily A, 12
NM_002588	PCDHGC5	Homo sapiens	protocadherin gamma subfamily C, 3; protocadherin gamma subfamily C, 5; protocadherin gamma subfamily C, 4; protocadherin gamma subfamily A, 12
NM_002588	PCDHGC4	Homo sapiens	protocadherin gamma subfamily C, 3; protocadherin gamma subfamily C, 5; protocadherin gamma subfamily C, 4; protocadherin gamma subfamily A, 12
NM_002588	PCDHGC3	Homo sapiens	protocadherin gamma subfamily C, 3; protocadherin gamma subfamily C, 5; protocadherin gamma subfamily C, 4; protocadherin gamma subfamily A, 12
NM_007104	RPL10AP9	Homo sapiens	ribosomal protein L10a pseudogene 6; ribosomal protein L10a; ribosomal protein L10a pseudogene 9
NM_007104	RPL10A	Homo sapiens	ribosomal protein L10a pseudogene 6; ribosomal protein L10a; ribosomal protein L10a pseudogene 9
NM_007104	RPL10AP6	Homo sapiens	ribosomal protein L10a pseudogene 6; ribosomal protein L10a; ribosomal protein L10a pseudogene 9
M21121	CCL5	Homo sapiens	chemokine (C-C motif) ligand 5
AF070655	atp5l	Homo sapiens	ATP synthase, H+ transporting, mitochondrial F0 complex, subunit G
NM_003151	STAT4	Homo sapiens	signal transducer and activator of transcription 4
NM_004863	Sptlc2	Homo sapiens	serine palmitoyltransferase, long chain base subunit 2
NM_000981	RPL19P12	Homo sapiens	ribosomal protein L19; ribosomal protein L19 pseudogene 12
NM_000981	rpl19	Homo sapiens	ribosomal protein L19; ribosomal protein L19 pseudogene 12
NM_000982	RPL21P14	Homo sapiens	ribosomal protein L21 pseudogene 134; ribosomal protein L21 pseudogene 80; ribosomal protein L21 pseudogene 20; ribosomal protein L21 pseudogene 46; ribosomal protein L21 pseudogene 45; ribosomal protein L21 pseudogene 131; ribosomal protein L21 pseudogene 16; ribosomal protein L21 pseudogene 53; ribosomal protein L21 pseudogene 120; ribosomal protein L21 pseudogene 37; ribosomal protein L21 pseu…
NM_000982	rpl21	Homo sapiens	ribosomal protein L21 pseudogene 134; ribosomal protein L21 pseudogene 80; ribosomal protein L21 pseudogene 20; ribosomal protein L21 pseudogene 46; ribosomal protein L21 pseudogene 45; ribosomal protein L21 pseudogene 131; ribosomal protein L21 pseudogene 16; ribosomal protein L21 pseudogene 53; ribosomal protein L21 pseudogene 120; ribosomal protein L21 pseudogene 37; ribosomal protein L21 pseu…
NM_000982	RPL21P20	Homo sapiens	ribosomal protein L21 pseudogene 134; ribosomal protein L21 pseudogene 80; ribosomal protein L21 pseudogene 20; ribosomal protein L21 pseudogene 46; ribosomal protein L21 pseudogene 45; ribosomal protein L21 pseudogene 131; ribosomal protein L21 pseudogene 16; ribosomal protein L21 pseudogene 53; ribosomal protein L21 pseudogene 120; ribosomal protein L21 pseudogene 37; ribosomal protein L21 pseu…
NM_000982	RPL21P80	Homo sapiens	ribosomal protein L21 pseudogene 134; ribosomal protein L21 pseudogene 80; ribosomal protein L21 pseudogene 20; ribosomal protein L21 pseudogene 46; ribosomal protein L21 pseudogene 45; ribosomal protein L21 pseudogene 131; ribosomal protein L21 pseudogene 16; ribosomal protein L21 pseudogene 53; ribosomal protein L21 pseudogene 120; ribosomal protein L21 pseudogene 37; ribosomal protein L21 pseu…
NM_000982	RPL21P119	Homo sapiens	ribosomal protein L21 pseudogene 134; ribosomal protein L21 pseudogene 80; ribosomal protein L21 pseudogene 20; ribosomal protein L21 pseudogene 46; ribosomal protein L21 pseudogene 45; ribosomal protein L21 pseudogene 131; ribosomal protein L21 pseudogene 16; ribosomal protein L21 pseudogene 53; ribosomal protein L21 pseudogene 120; ribosomal protein L21 pseudogene 37; ribosomal protein L21 pseu…
NM_000982	RPL21P128	Homo sapiens	ribosomal protein L21 pseudogene 134; ribosomal protein L21 pseudogene 80; ribosomal protein L21 pseudogene 20; ribosomal protein L21 pseudogene 46; ribosomal protein L21 pseudogene 45; ribosomal protein L21 pseudogene 131; ribosomal protein L21 pseudogene 16; ribosomal protein L21 pseudogene 53; ribosomal protein L21 pseudogene 120; ribosomal protein L21 pseudogene 37; ribosomal protein L21 pseu…
NM_000982	RPL21P131	Homo sapiens	ribosomal protein L21 pseudogene 134; ribosomal protein L21 pseudogene 80; ribosomal protein L21 pseudogene 20; ribosomal protein L21 pseudogene 46; ribosomal protein L21 pseudogene 45; ribosomal protein L21 pseudogene 131; ribosomal protein L21 pseudogene 16; ribosomal protein L21 pseudogene 53; ribosomal protein L21 pseudogene 120; ribosomal protein L21 pseudogene 37; ribosomal protein L21 pseu…
NM_000982	RPL21P105	Homo sapiens	ribosomal protein L21 pseudogene 134; ribosomal protein L21 pseudogene 80; ribosomal protein L21 pseudogene 20; ribosomal protein L21 pseudogene 46; ribosomal protein L21 pseudogene 45; ribosomal protein L21 pseudogene 131; ribosomal protein L21 pseudogene 16; ribosomal protein L21 pseudogene 53; ribosomal protein L21 pseudogene 120; ribosomal protein L21 pseudogene 37; ribosomal protein L21 pseu…
NM_000982	RPL21P134	Homo sapiens	ribosomal protein L21 pseudogene 134; ribosomal protein L21 pseudogene 80; ribosomal protein L21 pseudogene 20; ribosomal protein L21 pseudogene 46; ribosomal protein L21 pseudogene 45; ribosomal protein L21 pseudogene 131; ribosomal protein L21 pseudogene 16; ribosomal protein L21 pseudogene 53; ribosomal protein L21 pseudogene 120; ribosomal protein L21 pseudogene 37; ribosomal protein L21 pseu…
NM_000982	RPL21P93	Homo sapiens	ribosomal protein L21 pseudogene 134; ribosomal protein L21 pseudogene 80; ribosomal protein L21 pseudogene 20; ribosomal protein L21 pseudogene 46; ribosomal protein L21 pseudogene 45; ribosomal protein L21 pseudogene 131; ribosomal protein L21 pseudogene 16; ribosomal protein L21 pseudogene 53; ribosomal protein L21 pseudogene 120; ribosomal protein L21 pseudogene 37; ribosomal protein L21 pseu…
NM_000982	RPL21P29	Homo sapiens	ribosomal protein L21 pseudogene 134; ribosomal protein L21 pseudogene 80; ribosomal protein L21 pseudogene 20; ribosomal protein L21 pseudogene 46; ribosomal protein L21 pseudogene 45; ribosomal protein L21 pseudogene 131; ribosomal protein L21 pseudogene 16; ribosomal protein L21 pseudogene 53; ribosomal protein L21 pseudogene 120; ribosomal protein L21 pseudogene 37; ribosomal protein L21 pseu…
NM_000982	RPL21P125	Homo sapiens	ribosomal protein L21 pseudogene 134; ribosomal protein L21 pseudogene 80; ribosomal protein L21 pseudogene 20; ribosomal protein L21 pseudogene 46; ribosomal protein L21 pseudogene 45; ribosomal protein L21 pseudogene 131; ribosomal protein L21 pseudogene 16; ribosomal protein L21 pseudogene 53; ribosomal protein L21 pseudogene 120; ribosomal protein L21 pseudogene 37; ribosomal protein L21 pseu…
NM_000982	RPL21P16	Homo sapiens	ribosomal protein L21 pseudogene 134; ribosomal protein L21 pseudogene 80; ribosomal protein L21 pseudogene 20; ribosomal protein L21 pseudogene 46; ribosomal protein L21 pseudogene 45; ribosomal protein L21 pseudogene 131; ribosomal protein L21 pseudogene 16; ribosomal protein L21 pseudogene 53; ribosomal protein L21 pseudogene 120; ribosomal protein L21 pseudogene 37; ribosomal protein L21 pseu…
NM_000982	RPL21P28	Homo sapiens	ribosomal protein L21 pseudogene 134; ribosomal protein L21 pseudogene 80; ribosomal protein L21 pseudogene 20; ribosomal protein L21 pseudogene 46; ribosomal protein L21 pseudogene 45; ribosomal protein L21 pseudogene 131; ribosomal protein L21 pseudogene 16; ribosomal protein L21 pseudogene 53; ribosomal protein L21 pseudogene 120; ribosomal protein L21 pseudogene 37; ribosomal protein L21 pseu…
NM_000982	RPL21P120	Homo sapiens	ribosomal protein L21 pseudogene 134; ribosomal protein L21 pseudogene 80; ribosomal protein L21 pseudogene 20; ribosomal protein L21 pseudogene 46; ribosomal protein L21 pseudogene 45; ribosomal protein L21 pseudogene 131; ribosomal protein L21 pseudogene 16; ribosomal protein L21 pseudogene 53; ribosomal protein L21 pseudogene 120; ribosomal protein L21 pseudogene 37; ribosomal protein L21 pseu…
NM_000982	RPL21P87	Homo sapiens	ribosomal protein L21 pseudogene 134; ribosomal protein L21 pseudogene 80; ribosomal protein L21 pseudogene 20; ribosomal protein L21 pseudogene 46; ribosomal protein L21 pseudogene 45; ribosomal protein L21 pseudogene 131; ribosomal protein L21 pseudogene 16; ribosomal protein L21 pseudogene 53; ribosomal protein L21 pseudogene 120; ribosomal protein L21 pseudogene 37; ribosomal protein L21 pseu…
NM_000982	RPL21P39	Homo sapiens	ribosomal protein L21 pseudogene 134; ribosomal protein L21 pseudogene 80; ribosomal protein L21 pseudogene 20; ribosomal protein L21 pseudogene 46; ribosomal protein L21 pseudogene 45; ribosomal protein L21 pseudogene 131; ribosomal protein L21 pseudogene 16; ribosomal protein L21 pseudogene 53; ribosomal protein L21 pseudogene 120; ribosomal protein L21 pseudogene 37; ribosomal protein L21 pseu…
NM_000982	RPL21P98	Homo sapiens	ribosomal protein L21 pseudogene 134; ribosomal protein L21 pseudogene 80; ribosomal protein L21 pseudogene 20; ribosomal protein L21 pseudogene 46; ribosomal protein L21 pseudogene 45; ribosomal protein L21 pseudogene 131; ribosomal protein L21 pseudogene 16; ribosomal protein L21 pseudogene 53; ribosomal protein L21 pseudogene 120; ribosomal protein L21 pseudogene 37; ribosomal protein L21 pseu…
NM_000982	RPL21P97	Homo sapiens	ribosomal protein L21 pseudogene 134; ribosomal protein L21 pseudogene 80; ribosomal protein L21 pseudogene 20; ribosomal protein L21 pseudogene 46; ribosomal protein L21 pseudogene 45; ribosomal protein L21 pseudogene 131; ribosomal protein L21 pseudogene 16; ribosomal protein L21 pseudogene 53; ribosomal protein L21 pseudogene 120; ribosomal protein L21 pseudogene 37; ribosomal protein L21 pseu…
NM_000982	RPL21P69	Homo sapiens	ribosomal protein L21 pseudogene 134; ribosomal protein L21 pseudogene 80; ribosomal protein L21 pseudogene 20; ribosomal protein L21 pseudogene 46; ribosomal protein L21 pseudogene 45; ribosomal protein L21 pseudogene 131; ribosomal protein L21 pseudogene 16; ribosomal protein L21 pseudogene 53; ribosomal protein L21 pseudogene 120; ribosomal protein L21 pseudogene 37; ribosomal protein L21 pseu…
NM_000982	RPL21P46	Homo sapiens	ribosomal protein L21 pseudogene 134; ribosomal protein L21 pseudogene 80; ribosomal protein L21 pseudogene 20; ribosomal protein L21 pseudogene 46; ribosomal protein L21 pseudogene 45; ribosomal protein L21 pseudogene 131; ribosomal protein L21 pseudogene 16; ribosomal protein L21 pseudogene 53; ribosomal protein L21 pseudogene 120; ribosomal protein L21 pseudogene 37; ribosomal protein L21 pseu…
NM_000982	RPL21P37	Homo sapiens	ribosomal protein L21 pseudogene 134; ribosomal protein L21 pseudogene 80; ribosomal protein L21 pseudogene 20; ribosomal protein L21 pseudogene 46; ribosomal protein L21 pseudogene 45; ribosomal protein L21 pseudogene 131; ribosomal protein L21 pseudogene 16; ribosomal protein L21 pseudogene 53; ribosomal protein L21 pseudogene 120; ribosomal protein L21 pseudogene 37; ribosomal protein L21 pseu…
NM_000982	RPL21P45	Homo sapiens	ribosomal protein L21 pseudogene 134; ribosomal protein L21 pseudogene 80; ribosomal protein L21 pseudogene 20; ribosomal protein L21 pseudogene 46; ribosomal protein L21 pseudogene 45; ribosomal protein L21 pseudogene 131; ribosomal protein L21 pseudogene 16; ribosomal protein L21 pseudogene 53; ribosomal protein L21 pseudogene 120; ribosomal protein L21 pseudogene 37; ribosomal protein L21 pseu…
NM_000982	RPL21P53	Homo sapiens	ribosomal protein L21 pseudogene 134; ribosomal protein L21 pseudogene 80; ribosomal protein L21 pseudogene 20; ribosomal protein L21 pseudogene 46; ribosomal protein L21 pseudogene 45; ribosomal protein L21 pseudogene 131; ribosomal protein L21 pseudogene 16; ribosomal protein L21 pseudogene 53; ribosomal protein L21 pseudogene 120; ribosomal protein L21 pseudogene 37; ribosomal protein L21 pseu…
NM_016086	STYXL1	Homo sapiens	serine/threonine/tyrosine interacting-like 1
NM_000985	RPL17P18	Homo sapiens	ribosomal protein L17 pseudogene 22; ribosomal protein L17 pseudogene 36; ribosomal protein L17 pseudogene 20; similar to ribosomal protein L17; ribosomal protein L17 pseudogene 33; ribosomal protein L17 pseudogene 34; ribosomal protein L17 pseudogene 9; ribosomal protein L17; ribosomal protein L17 pseudogene 18; ribosomal protein L17 pseudogene 7; ribosomal protein L17 pseudogene 39
NM_000985	RPL17P39	Homo sapiens	ribosomal protein L17 pseudogene 22; ribosomal protein L17 pseudogene 36; ribosomal protein L17 pseudogene 20; similar to ribosomal protein L17; ribosomal protein L17 pseudogene 33; ribosomal protein L17 pseudogene 34; ribosomal protein L17 pseudogene 9; ribosomal protein L17; ribosomal protein L17 pseudogene 18; ribosomal protein L17 pseudogene 7; ribosomal protein L17 pseudogene 39
NM_000985	RPL17P7	Homo sapiens	ribosomal protein L17 pseudogene 22; ribosomal protein L17 pseudogene 36; ribosomal protein L17 pseudogene 20; similar to ribosomal protein L17; ribosomal protein L17 pseudogene 33; ribosomal protein L17 pseudogene 34; ribosomal protein L17 pseudogene 9; ribosomal protein L17; ribosomal protein L17 pseudogene 18; ribosomal protein L17 pseudogene 7; ribosomal protein L17 pseudogene 39
NM_000985	RPL17P20	Homo sapiens	ribosomal protein L17 pseudogene 22; ribosomal protein L17 pseudogene 36; ribosomal protein L17 pseudogene 20; similar to ribosomal protein L17; ribosomal protein L17 pseudogene 33; ribosomal protein L17 pseudogene 34; ribosomal protein L17 pseudogene 9; ribosomal protein L17; ribosomal protein L17 pseudogene 18; ribosomal protein L17 pseudogene 7; ribosomal protein L17 pseudogene 39
NM_000985	LOC729046	Homo sapiens	ribosomal protein L17 pseudogene 22; ribosomal protein L17 pseudogene 36; ribosomal protein L17 pseudogene 20; similar to ribosomal protein L17; ribosomal protein L17 pseudogene 33; ribosomal protein L17 pseudogene 34; ribosomal protein L17 pseudogene 9; ribosomal protein L17; ribosomal protein L17 pseudogene 18; ribosomal protein L17 pseudogene 7; ribosomal protein L17 pseudogene 39
NM_000985	RPL17P33	Homo sapiens	ribosomal protein L17 pseudogene 22; ribosomal protein L17 pseudogene 36; ribosomal protein L17 pseudogene 20; similar to ribosomal protein L17; ribosomal protein L17 pseudogene 33; ribosomal protein L17 pseudogene 34; ribosomal protein L17 pseudogene 9; ribosomal protein L17; ribosomal protein L17 pseudogene 18; ribosomal protein L17 pseudogene 7; ribosomal protein L17 pseudogene 39
NM_000985	RPL17P34	Homo sapiens	ribosomal protein L17 pseudogene 22; ribosomal protein L17 pseudogene 36; ribosomal protein L17 pseudogene 20; similar to ribosomal protein L17; ribosomal protein L17 pseudogene 33; ribosomal protein L17 pseudogene 34; ribosomal protein L17 pseudogene 9; ribosomal protein L17; ribosomal protein L17 pseudogene 18; ribosomal protein L17 pseudogene 7; ribosomal protein L17 pseudogene 39
NM_000985	RPL17P9	Homo sapiens	ribosomal protein L17 pseudogene 22; ribosomal protein L17 pseudogene 36; ribosomal protein L17 pseudogene 20; similar to ribosomal protein L17; ribosomal protein L17 pseudogene 33; ribosomal protein L17 pseudogene 34; ribosomal protein L17 pseudogene 9; ribosomal protein L17; ribosomal protein L17 pseudogene 18; ribosomal protein L17 pseudogene 7; ribosomal protein L17 pseudogene 39
NM_000985	RPL17P22	Homo sapiens	ribosomal protein L17 pseudogene 22; ribosomal protein L17 pseudogene 36; ribosomal protein L17 pseudogene 20; similar to ribosomal protein L17; ribosomal protein L17 pseudogene 33; ribosomal protein L17 pseudogene 34; ribosomal protein L17 pseudogene 9; ribosomal protein L17; ribosomal protein L17 pseudogene 18; ribosomal protein L17 pseudogene 7; ribosomal protein L17 pseudogene 39
NM_000985	RpL17	Homo sapiens	ribosomal protein L17 pseudogene 22; ribosomal protein L17 pseudogene 36; ribosomal protein L17 pseudogene 20; similar to ribosomal protein L17; ribosomal protein L17 pseudogene 33; ribosomal protein L17 pseudogene 34; ribosomal protein L17 pseudogene 9; ribosomal protein L17; ribosomal protein L17 pseudogene 18; ribosomal protein L17 pseudogene 7; ribosomal protein L17 pseudogene 39
NM_000985	RPL17P36	Homo sapiens	ribosomal protein L17 pseudogene 22; ribosomal protein L17 pseudogene 36; ribosomal protein L17 pseudogene 20; similar to ribosomal protein L17; ribosomal protein L17 pseudogene 33; ribosomal protein L17 pseudogene 34; ribosomal protein L17 pseudogene 9; ribosomal protein L17; ribosomal protein L17 pseudogene 18; ribosomal protein L17 pseudogene 7; ribosomal protein L17 pseudogene 39
NM_002622	PFDN1	Homo sapiens	prefoldin subunit 1
NM_016404	LOC391358	Homo sapiens	tRNA methyltransferase 11-2 homolog (S. cerevisiae); similar to CG12975
NM_016404	TRMT112	Homo sapiens	tRNA methyltransferase 11-2 homolog (S. cerevisiae); similar to CG12975
NM_004907	ier2	Homo sapiens	immediate early response 2
BC001211	Kifc3	Homo sapiens	kinesin family member C3
NM_004904	CREB5	Homo sapiens	cAMP responsive element binding protein 5
NM_001072	UGT1A7	Homo sapiens	UDP glucuronosyltransferase 1 family, polypeptide A3; UDP glucuronosyltransferase 1 family, polypeptide A5; UDP glucuronosyltransferase 1 family, polypeptide A4; UDP glucuronosyltransferase 1 family, polypeptide A7; UDP glucuronosyltransferase 1 family, polypeptide A6; UDP glucuronosyltransferase 1 family, polypeptide A10; UDP glucuronosyltransferase 1 family, polypeptide A9; UDP glucuronosyltran…
NM_001072	Ugt1a1	Homo sapiens	UDP glucuronosyltransferase 1 family, polypeptide A3; UDP glucuronosyltransferase 1 family, polypeptide A5; UDP glucuronosyltransferase 1 family, polypeptide A4; UDP glucuronosyltransferase 1 family, polypeptide A7; UDP glucuronosyltransferase 1 family, polypeptide A6; UDP glucuronosyltransferase 1 family, polypeptide A10; UDP glucuronosyltransferase 1 family, polypeptide A9; UDP glucuronosyltran…
NM_001072	UGT1A4	Homo sapiens	UDP glucuronosyltransferase 1 family, polypeptide A3; UDP glucuronosyltransferase 1 family, polypeptide A5; UDP glucuronosyltransferase 1 family, polypeptide A4; UDP glucuronosyltransferase 1 family, polypeptide A7; UDP glucuronosyltransferase 1 family, polypeptide A6; UDP glucuronosyltransferase 1 family, polypeptide A10; UDP glucuronosyltransferase 1 family, polypeptide A9; UDP glucuronosyltran…
NM_001072	Ugt1a8	Homo sapiens	UDP glucuronosyltransferase 1 family, polypeptide A3; UDP glucuronosyltransferase 1 family, polypeptide A5; UDP glucuronosyltransferase 1 family, polypeptide A4; UDP glucuronosyltransferase 1 family, polypeptide A7; UDP glucuronosyltransferase 1 family, polypeptide A6; UDP glucuronosyltransferase 1 family, polypeptide A10; UDP glucuronosyltransferase 1 family, polypeptide A9; UDP glucuronosyltran…
NM_001072	Ugt1a9	Homo sapiens	UDP glucuronosyltransferase 1 family, polypeptide A3; UDP glucuronosyltransferase 1 family, polypeptide A5; UDP glucuronosyltransferase 1 family, polypeptide A4; UDP glucuronosyltransferase 1 family, polypeptide A7; UDP glucuronosyltransferase 1 family, polypeptide A6; UDP glucuronosyltransferase 1 family, polypeptide A10; UDP glucuronosyltransferase 1 family, polypeptide A9; UDP glucuronosyltran…
NM_001072	Ugt1a6	Homo sapiens	UDP glucuronosyltransferase 1 family, polypeptide A3; UDP glucuronosyltransferase 1 family, polypeptide A5; UDP glucuronosyltransferase 1 family, polypeptide A4; UDP glucuronosyltransferase 1 family, polypeptide A7; UDP glucuronosyltransferase 1 family, polypeptide A6; UDP glucuronosyltransferase 1 family, polypeptide A10; UDP glucuronosyltransferase 1 family, polypeptide A9; UDP glucuronosyltran…
NM_001072	Ugt1a5	Homo sapiens	UDP glucuronosyltransferase 1 family, polypeptide A3; UDP glucuronosyltransferase 1 family, polypeptide A5; UDP glucuronosyltransferase 1 family, polypeptide A4; UDP glucuronosyltransferase 1 family, polypeptide A7; UDP glucuronosyltransferase 1 family, polypeptide A6; UDP glucuronosyltransferase 1 family, polypeptide A10; UDP glucuronosyltransferase 1 family, polypeptide A9; UDP glucuronosyltran…
NM_001072	Ugt1a10	Homo sapiens	UDP glucuronosyltransferase 1 family, polypeptide A3; UDP glucuronosyltransferase 1 family, polypeptide A5; UDP glucuronosyltransferase 1 family, polypeptide A4; UDP glucuronosyltransferase 1 family, polypeptide A7; UDP glucuronosyltransferase 1 family, polypeptide A6; UDP glucuronosyltransferase 1 family, polypeptide A10; UDP glucuronosyltransferase 1 family, polypeptide A9; UDP glucuronosyltran…
NM_001072	Ugt1a3	Homo sapiens	UDP glucuronosyltransferase 1 family, polypeptide A3; UDP glucuronosyltransferase 1 family, polypeptide A5; UDP glucuronosyltransferase 1 family, polypeptide A4; UDP glucuronosyltransferase 1 family, polypeptide A7; UDP glucuronosyltransferase 1 family, polypeptide A6; UDP glucuronosyltransferase 1 family, polypeptide A10; UDP glucuronosyltransferase 1 family, polypeptide A9; UDP glucuronosyltran…
U38545	PLD1	Homo sapiens	phospholipase D1, phosphatidylcholine-specific
BC002649	Hist1h1c	Homo sapiens	histone cluster 1, H1c
M96739	NHLH1	Homo sapiens	nescient helix loop helix 1
AF007131	LOC100129973	Homo sapiens	hypothetical protein LOC100129973
D26480	CYP4F2	Homo sapiens	cytochrome P450, family 4, subfamily F, polypeptide 2
NM_000300	Pla2g2a	Homo sapiens	phospholipase A2, group IIA (platelets, synovial fluid)
NM_004472	foxd1	Homo sapiens	forkhead box D1
NM_004396	DDX5	Homo sapiens	DEAD (Asp-Glu-Ala-Asp) box polypeptide 5
AB051538	KIAA1751	Homo sapiens	KIAA1751
NM_001129	Aebp1	Homo sapiens	AE binding protein 1
NM_006065	SIRPB1	Homo sapiens	signal-regulatory protein beta 1
D14134	rad51	Homo sapiens	RAD51 homolog (RecA homolog, E. coli) (S. cerevisiae)
AF112972	ATP6V0A2	Homo sapiens	ATPase, H+ transporting, lysosomal V0 subunit a2
NM_002012	FHIT	Homo sapiens	fragile histidine triad gene
NM_004219	Pttg2	Homo sapiens	pituitary tumor-transforming 1; pituitary tumor-transforming 2
NM_004219	PTTG1	Homo sapiens	pituitary tumor-transforming 1; pituitary tumor-transforming 2
NM_003226	Tff3	Homo sapiens	trefoil factor 3 (intestinal)
NM_021076	NEFH	Homo sapiens	neurofilament, heavy polypeptide
NM_006662	Srcap	Homo sapiens	Snf2-related CREBBP activator protein
L41690	TRADD	Homo sapiens	TNFRSF1A-associated via death domain
X79510	PTPN21	Homo sapiens	protein tyrosine phosphatase, non-receptor type 21
BC005220	CCT8P1	Homo sapiens	similar to chaperonin containing TCP1, subunit 8 (theta); chaperonin containing TCP1, subunit 8 (theta)
BC005220	CCT8	Homo sapiens	similar to chaperonin containing TCP1, subunit 8 (theta); chaperonin containing TCP1, subunit 8 (theta)
NM_000390	CHM	Homo sapiens	choroideremia (Rab escort protein 1)
NM_001882	CRHBP	Homo sapiens	corticotropin releasing hormone binding protein
NM_014888	FAM3C	Homo sapiens	family with sequence similarity 3, member C
NM_002727	srgn	Homo sapiens	serglycin
NM_000726	CACNB4	Homo sapiens	calcium channel, voltage-dependent, beta 4 subunit
NM_004285	H6pd	Homo sapiens	hexose-6-phosphate dehydrogenase (glucose 1-dehydrogenase)
NM_007168	abca8	Homo sapiens	ATP-binding cassette, sub-family A (ABC1), member 8
U06935	tef	Homo sapiens	thyrotrophic embryonic factor
NM_001181	Asgr2	Homo sapiens	asialoglycoprotein receptor 2
U76376	HRK	Homo sapiens	harakiri, BCL2 interacting protein (contains only BH3 domain)
L00635	Fntb	Homo sapiens	farnesyltransferase, CAAX box, beta
NM_016587	LOC644101	Homo sapiens	similar to chromobox homolog 3; chromobox homolog 3 (HP1 gamma homolog, Drosophila)
NM_016587	CBX3	Homo sapiens	similar to chromobox homolog 3; chromobox homolog 3 (HP1 gamma homolog, Drosophila)
NM_012231	PRDM2	Homo sapiens	PR domain containing 2, with ZNF domain
AC004857	etv1	Homo sapiens	ets variant 1
NM_015153	PHF3	Homo sapiens	PHD finger protein 3
AL117502	nek9	Homo sapiens	NIMA (never in mitosis gene a)- related kinase 9
NM_003175	XCL2	Homo sapiens	chemokine (C motif) ligand 2
NM_002478	MYOD1	Homo sapiens	myogenic differentiation 1
M33318	cyp2a6	Homo sapiens	cytochrome P450, family 2, subfamily A, polypeptide 6
NM_005655	KLF10	Homo sapiens	Kruppel-like factor 10
NM_015343	dullard	Homo sapiens	dullard homolog (Xenopus laevis)
Z48481	MMP14	Homo sapiens	matrix metallopeptidase 14 (membrane-inserted)
NM_016155	MMP17	Homo sapiens	matrix metallopeptidase 17 (membrane-inserted)
NM_000537	REN	Homo sapiens	renin
NM_014897	ZNF652	Homo sapiens	zinc finger protein 652
NM_002830	PTPN4	Homo sapiens	protein tyrosine phosphatase, non-receptor type 4 (megakaryocyte)
BC002571	ABHD14A	Homo sapiens	abhydrolase domain containing 14A
BC001161	ZNF174	Homo sapiens	zinc finger protein 174
NM_000970	RPL6P27	Homo sapiens	ribosomal protein L6 pseudogene 27; ribosomal protein L6 pseudogene 19; ribosomal protein L6; ribosomal protein L6 pseudogene 10
NM_000970	rpl6	Homo sapiens	ribosomal protein L6 pseudogene 27; ribosomal protein L6 pseudogene 19; ribosomal protein L6; ribosomal protein L6 pseudogene 10
NM_000970	RPL6P19	Homo sapiens	ribosomal protein L6 pseudogene 27; ribosomal protein L6 pseudogene 19; ribosomal protein L6; ribosomal protein L6 pseudogene 10
NM_000970	RPL6P10	Homo sapiens	ribosomal protein L6 pseudogene 27; ribosomal protein L6 pseudogene 19; ribosomal protein L6; ribosomal protein L6 pseudogene 10
NM_001659	ARF3	Homo sapiens	ADP-ribosylation factor 3

## Sheet: S3
Table S3
GENBANK_Accession	gene symbol	cancer	Cox Coefficient	P-Value	FDR Corrected	Rank	Median Expression	Mean Expression
NM_025213	SPTBN4	LGG	-0.326	0.0012	0.00406	4965	677.38	784.35
L13720	gas6	---
U26266	dhps	LGG	-0.357	5.9e-05	0.000329	3007	1351.2	1421.78
NM_004730	etf1	LGG	0.313	0.0023	0.00703	5478	1796.53	1845
		BLCA	0.276	0.00041	0.0258	258	2281.8	2422.53
		KIRC	-0.189	0.017	0.0473	5942	2412.35	2583.31
AK021738	TMC6	SKCM	0.214	0.0036	0.0331	1743	1669.81	2090.05
M38083	nagA	LGG	0.491	8.7e-07	1.11e-05	1321	585.48	646.98
NM_001020	rps16	---
NM_020151	STARD7	KIRC	-0.251	0.0016	0.00741	3596	2959.46	3072.45
NM_005815	ZNF443	LGG	0.453	3.5e-07	5.41e-06	1089	72.64	77
		KIRP	-0.589	0.00067	0.00781	1411	103.14	112.03
		BLCA	-0.257	0.0013	0.0446	475	101.49	126.11
NM_016333	SRRM2	KIRC	0.297	0.00018	0.00135	2223	10263	11094.9
NM_002250	KCNN4	LGG	0.469	9.6e-06	7.48e-05	2157	15.79	30.5
		KIRC	0.357	3e-05	0.000339	1470	35.09	62.21
		SKCM	-0.247	0.00018	0.00412	697	709.08	1754.44
		KIRP	0.418	0.0065	0.037	2874	41.05	113.32
AK026191	ddah2	KIRC	0.262	0.00091	0.00479	3161	1093.14	1219.13
		LGG	0.308	0.0018	0.00573	5248	1644.45	1778.1
NM_003579	RAD54L	KIRC	0.45	6.7e-08	3.49e-06	320	30.57	44.46
		LGG	0.445	6e-06	5.14e-05	1962	31.52	60.95
		KIRP	0.752	4.2e-06	0.000215	319	28.32	43.94
		LIHC	0.366	0.00011	0.00752	229	48.13	98.19
		SARC	0.305	0.0021	0.0478	707	255.68	318.61
NM_002588	PCDHGA12	KIRC	-0.233	0.0022	0.00954	3837	51.3	91.46
		KIRP	0.445	0.0041	0.027	2490	10.53	26.24
	PCDHGC5	KIRC	0.218	0.007	0.0236	4931	12.07	19.15
	PCDHGC4	LGG	-0.229	0.0047	0.0129	6146	696.93	1065.32
	PCDHGC3	LGG	-0.308	0.00096	0.00339	4765	27885.3	31200.3
		BLCA	0.252	0.0014	0.0454	500	1311.55	1585.79
NM_007104	RPL10A	LGG	-0.448	3.6e-06	3.41e-05	1772	4920.88	5420.04
M21121	CCL5	SKCM	-0.278	1.8e-05	0.000831	347	588.44	1805.06
		SARC	-0.399	0.00062	0.0262	382	414.65	1500.16
AF070655	atp5l	LGG	-0.253	0.0083	0.0208	6686	2018.92	2139.49
NM_003151	STAT4	SKCM	-0.341	3.7e-07	0.0001	59	30.35	64.99
NM_004863	Sptlc2	KIRC	-0.226	0.0043	0.0162	4421	1587.27	1681.4
NM_000981	rpl19	LGG	-0.371	0.00016	0.000746	3599	13361	14360.7
		KIRC	0.221	0.0069	0.0234	4915	19005.2	21049.4
NM_000982	rpl21	LGG	-0.449	5.4e-07	7.63e-06	1189	12.8	15.93
NM_016086	STYXL1	KIRC	0.286	0.00031	0.00206	2506	391.4	447.75
NM_000985	RpL17	LGG	-0.425	7.1e-06	5.87e-05	2036	3563.3	3928.33
NM_002622	PFDN1	LGG	-0.224	0.018	0.0396	7607	1336.86	1350.57
NM_016404	TRMT112	---
NM_004907	ier2	---
BC001211	Kifc3	---
NM_004904	CREB5	LGG	0.435	2.7e-06	2.71e-05	1660	750.87	920.98
NM_001072	Ugt1a1	---
	Ugt1a3	KIRC	-0.211	0.0062	0.0215	4811	13.26	44.51
	Ugt1a5	---
	Ugt1a6	---
	Ugt1a8	---
	Ugt1a9	KIRC	-0.276	0.00044	0.00271	2708	2464.13	3756.98
	Ugt1a10	---
U38545	PLD1	LGG	0.292	0.0011	0.00377	4894	134.51	189.6
BC002649	Hist1h1c	LGG	0.322	0.00085	0.00305	4690	134.08	203.15
M96739	NHLH1	LGG	0.333	0.00023	0.00101	3827	12.02	21.7
		KIRC	0.291	0.0004	0.0025	2662	4.23	5.64
D26480	CYP4F2	---
NM_000300	Pla2g2a	---
NM_004472	foxd1	LGG	0.393	3.7e-05	0.000226	2743	119.39	169.06
		KIRP	0.673	4.7e-05	0.00117	662	5.02	25.77
		KIRC	0.197	0.015	0.0429	5778	30.05	59.1
NM_004396	DDX5	SKCM	-0.244	0.00097	0.0137	1135	10173.1	10365
AB051538	KIAA1751 (CFAP74)	---
NM_001129	Aebp1	LGG	0.461	2.8e-07	4.52e-06	1034	1305.37	3424.09
		KIRP	0.539	0.00029	0.00438	1073	2675.24	6554.63
NM_006065	SIRPB1	---
D14134	rad51	KIRP	0.868	6.2e-07	5.66e-05	180	27.11	40.24
		LGG	0.361	0.00031	0.00129	4037	23.23	44.68
		LUAD	0.248	0.00076	0.0232	550	114.43	142.88
		LIHC	0.284	0.002	0.0365	866	66.05	91.56
		PAAD	0.338	0.0029	0.0424	1172	101.5	112.94
AF112972	ATP6V0A2	---
NM_002012	FHIT	KIRP	-0.47	0.0042	0.0275	2501	164.57	187.07
		LUAD	-0.231	0.003	0.0447	1117	34.26	40.1
NM_004219	Pttg2	BLCA	-0.239	0.0018	0.0492	593	1.59	2.73
	PTTG1	KIRP	1.071	1e-08	2.32e-06	70	61.84	110.68
		LGG	0.41	8.7e-05	0.000456	3210	75.75	151.93
		KIRC	0.36	5.2e-05	0.000521	1659	99.42	157.03
		LIHC	0.398	3.3e-05	0.00429	122	304.74	491.89
		LUAD	0.267	0.00067	0.0223	502	387.29	510.75
NM_003226	Tff3	---
NM_021076	NEFH	SARC	0.38	0.00073	0.0288	411	48	291.34
NM_006662	Srcap	SKCM	0.232	0.0013	0.0167	1249	3332.95	3552.75
L41690	TRADD	LGG	0.334	0.00031	0.00129	4043	116.08	138.21
		SARC	-0.391	0.00023	0.0171	218	416.38	490.8
		KIRP	-0.427	0.0088	0.0454	3185	850.96	949.07
X79510	PTPN21	LGG	0.28	0.003	0.00883	5710	513.84	577.93
BC005220	CCT8	KIRP	0.44	0.0074	0.0406	2984	2758.6	2863.68
NM_000390	CHM	KIRC	-0.255	0.0014	0.00666	3471	709.84	718.62
		SKCM	-0.228	0.0025	0.0264	1512	572.45	601.46
NM_001882	CRHBP	KIRC	-0.308	7.8e-05	0.000712	1820	14.89	48.08
		LUAD	-0.229	0.0035	0.0488	1193	2.53	3.8
NM_014888	FAM3C	LGG	0.316	0.0011	0.00377	4860	1302.98	1457.92
		KIRP	0.535	0.00069	0.00797	1420	1053.03	1210.12
		SKCM	-0.206	0.0042	0.0365	1835	1305.94	1587.79
		PAAD	0.338	0.0024	0.0386	1056	2064.4	2475.38
NM_002727	srgn	SKCM	-0.371	4.4e-07	0.000102	69	1062.79	1625.49
		LGG	0.25	0.0082	0.0206	6684	817.22	1156.78
NM_000726	CACNB4	KIRC	0.303	9.2e-05	0.00081	1891	18.83	37.2
		PAAD	-0.415	0.00026	0.0141	310	28.48	36.92
		LUAD	-0.268	0.001	0.0255	642	31.85	64.61
NM_004285	H6pd	LGG	0.489	3.8e-07	5.78e-06	1102	1192.06	1273.19
NM_007168	abca8	LGG	0.335	0.00071	0.00261	4565	448.71	608.15
		LUAD	-0.214	0.0033	0.047	1155	72.67	158.22
U06935	tef	LGG	-0.645	4.9e-10	4.12e-08	200	1682.42	1773.54
		KIRP	-0.856	7.8e-06	0.000327	392	815.76	900.39
		KIRC	-0.241	0.0041	0.0156	4386	1026.4	1130.87
NM_001181	Asgr2	SKCM	-0.221	0.0016	0.0193	1306	5.05	11.07
		LGG	0.231	0.015	0.034	7354	4.42	7.36
U76376	HRK	---
L00635	Fntb	BLCA	0.228	0.0014	0.0454	489	573.9	595.7
NM_016587	CBX3	LIHC	0.364	0.00014	0.00871	251	2398.59	2636.16
		KIRC	0.241	0.003	0.0122	4066	2672.8	2850.31
		PAAD	0.356	0.0009	0.025	618	2858.35	2936.04
NM_012231	PRDM2	LUAD	-0.269	0.00025	0.0135	307	1089.24	1134.73
AC004857	etv1	---
NM_015153	PHF3	KIRP	0.521	0.0018	0.015	1962	1177.35	1241.3
		KIRC	-0.191	0.018	0.0496	6030	2005.14	2014.57
AL117502	nek9	---
NM_003175	XCL2	SKCM	-0.332	3e-06	0.000266	181	8.27	26.43
		SARC	-0.404	0.00055	0.0249	359	8.97	27.01
NM_002478	MYOD1	LGG	-0.529	4.5e-06	4.08e-05	1850	2.56	16.87
M33318	cyp2a6	LGG	-0.275	0.0024	0.0073	5514	3.07	4.87
NM_005655	KLF10	LGG	0.282	0.0063	0.0165	6433	439.24	561.97
		KIRC	-0.16	0.052	0.113	7647	2666.23	3252.6
		PAAD	0.238	0.04	0.161	4258	1687.61	1745.28
NM_015343	Dullard ( CTDNEP1)	LGG	-0.252	0.0089	0.0221	6768	2391.71	2470.15
Z48481	MMP14	LGG	0.546	5.4e-09	2.31e-07	393	893.1	1378.87
		LUAD	0.232	0.002	0.0361	918	5561.39	7254.93
NM_016155	MMP17	KIRC	0.359	1e-05	0.000142	1170	8.11	29.36
NM_000537	REN	KIRP	0.489	0.0018	0.015	1965	2.57	38.79
NM_014897	ZNF652	KIRP	0.436	0.0083	0.0437	3123	1004.16	1031.58
NM_002830	PTPN4	---
BC002571	ABHD14A	LGG	-0.582	2.9e-10	2.9e-08	165	603.67	626.08
		KIRP	-0.507	0.0023	0.0179	2094	639.47	734.62
BC001161	ZNF174	---
NM_000970	rpl6	LGG	-0.44	1.3e-06	1.51e-05	1443	6012.13	6429.04
		KIRC	0.269	0.00093	0.00487	3183	8395.41	9196.12
NM_001659	ARF3	LGG	-0.253	0.0078	0.0198	6634	8113	8431.99

## Sheet: S4
Table S4
SPTBN4
dhps
etf1
TMC6
nagA
STARD7
ZNF443
SRRM2
KCNN4
ddah2
RAD54L
PCDHGA12
PCDHGC5
PCDHGC4
PCDHGC3
RPL10A
CCL5
atp5l
STAT4
Sptlc2
rpl19
rpl21
STYXL1
RpL17
PFDN1
CREB5
Ugt1a3
Ugt1a9
PLD1
Hist1h1c
NHLH1
foxd1
DDX5
Aebp1
rad51
FHIT
Pttg2
PTTG1
NEFH
Srcap
TRADD
PTPN21
CCT8
CHM
CRHBP
FAM3C
srgn
CACNB4
H6pd
abca8
tef
Asgr2
Fntb
CBX3
PRDM2
PHF3
XCL2
MYOD1
cyp2a6
KLF10
Dullard ( CTDNEP1)
MMP14
MMP17
REN
ZNF652
ABHD14A
rpl6
ARF3

## Sheet: S5
Table S5
DAVID
Transcription factor
Category	Term	Count	%	PValue	Genes	List Total	Pop Hits	Pop Total	Fold Enrichment	Bonferroni	Benjamini	FDR
UCSC_TFBS	P300	37	55.2239	2.78272e-05	FHIT, STYXL1, MYOD1, AEBP1, RPL19, CRHBP, PCDHGC5, PTPN21, PCDHGC4, PCDHGC3, CACNB4, ZNF652, FNTB, UGT1A9, UGT1A3, REN, SRRM2, NAGA, TEF, ATP5L, DDAH2, FOXD1, PCDHGA12, KLF10, SPTBN4, CREB5, MMP14, ETF1, RAD54L, RAD51, TRADD, H6PD, ARF3, PRDM2, DHPS, SRCAP, NHLH1	66	6339	20726	1.83296	0.00491337	0.00491337	0.0341745
UCSC_TFBS	E47	50	74.6269	5.31344e-05	FHIT, RPL17, AEBP1, PTTG2, PTPN21, PTTG1, FNTB, ASGR2, SRRM2, ATP5L, DDAH2, PCDHGA12, PLD1, HIST1H1C, MMP17, MMP14, PFDN1, H6PD, PRDM2, DHPS, SRCAP, ABCA8, STYXL1, PCDHGC5, PCDHGC4, CACNB4, PCDHGC3, ZNF652, UGT1A9, UGT1A3, REN, NAGA, CHM, TEF, NEFH, RPL10A, FOXD1, SRGN, KLF10, SPTBN4, CREB5, ETF1, DDX5, RAD54L, TRADD, KCNN4, ARF3, CCT8, XCL2, NHLH1	66	10601	20726	1.48114	0.00936096	0.00469148	0.065245
UCSC_TFBS	AHR	33	49.2537	0.000143158	ABCA8, FHIT, MYOD1, AEBP1, FAM3C, PCDHGC5, PCDHGC4, PCDHGC3, ZNF652, FNTB, SRRM2, NAGA, TEF, NEFH, RPL10A, FOXD1, PCDHGA12, HIST1H1C, KLF10, SPTBN4, ABHD14A, CREB5, RAD54L, RAD51, TRADD, KCNN4, PHF3, H6PD, ARF3, PRDM2, DHPS, SRCAP, NHLH1	66	5674	20726	1.8264	0.0250224	0.00841135	0.175698
UCSC_TFBS	HMX1	40	59.7015	0.000210207	ABCA8, FHIT, STYXL1, MYOD1, AEBP1, CBX3, PCDHGC5, PTTG2, PCDHGC4, PCDHGC3, PTTG1, CACNB4, CCL5, ZNF652, FNTB, UGT1A9, STAT4, UGT1A3, REN, SRRM2, TEF, NEFH, RPL10A, DDAH2, PCDHGA12, PLD1, SPTBN4, ABHD14A, MMP17, CREB5, DDX5, RAD54L, TRADD, PFDN1, PHF3, ARF3, PRDM2, DHPS, SRCAP, XCL2	66	7806	20726	1.60917	0.0365268	0.00925951	0.257889
UCSC_TFBS	AREB6	60	89.5522	0.000388772	FHIT, RPL17, MYOD1, AEBP1, RPL19, FAM3C, CRHBP, CBX3, PTTG2, PTPN21, PTTG1, FNTB, STARD7, SRRM2, ATP5L, DDAH2, PCDHGA12, PLD1, HIST1H1C, SPTLC2, MMP17, MMP14, RAD51, PFDN1, H6PD, CYP2A6, PRDM2, DHPS, SRCAP, ABCA8, STYXL1, PCDHGC5, PCDHGC4, PCDHGC3, CACNB4, CCL5, ZNF652, STAT4, UGT1A9, UGT1A3, REN, TEF, CHM, NEFH, RPL10A, FOXD1, SRGN, TMC6, KLF10, SPTBN4, ABHD14A, CREB5, ETF1, DDX5, RAD54L, TRADD,…	66	15152	20726	1.24352	0.0665109	0.0136709	0.476479
UCSC_TFBS	GATA2	31	46.2687	0.00169528	STYXL1, MYOD1, AEBP1, CBX3, PCDHGC5, PCDHGC4, PCDHGC3, CACNB4, ZNF652, FNTB, UGT1A9, UGT1A3, REN, SRRM2, TEF, DDAH2, PCDHGA12, SPTBN4, ABHD14A, CREB5, MMP14, RAD54L, TRADD, KCNN4, PHF3, RPL21, ARF3, PRDM2, XCL2, SRCAP, NHLH1	66	5880	20726	1.6556	0.259418	0.0488212	2.0625
UCSC_TFBS	MEIS1AHOXA9	31	46.2687	0.00174038	ABCA8, FHIT, CRHBP, CBX3, PCDHGC5, PTPN21, PCDHGC4, PTTG2, PTTG1, CACNB4, PCDHGC3, ZNF652, FNTB, UGT1A9, UGT1A3, RPL6, SRRM2, CHM, RPL10A, PCDHGA12, PLD1, HIST1H1C, SPTLC2, KLF10, SPTBN4, ABHD14A, CREB5, DDX5, RAD51, H6PD, ARF3	66	5889	20726	1.65307	0.265317	0.0430893	2.11683
REACTOME_PATHWAY
Category	Term	Count	%	PValue	Genes	List Total	Pop Hits	Pop Total	Fold Enrichment	Bonferroni	Benjamini	FDR
REACTOME_PATHWAY	R-HSA-72764:R-HSA-72764	6	8.95522	2.84828e-05	RPL17, RPL19, RPL6, RPL21, RPL10A, ETF1	37	90	8857	15.9586	0.00207711	0.00207711	0.0297262
REACTOME_PATHWAY	R-HSA-975956:R-HSA-975956	6	8.95522	3.1685e-05	RPL17, RPL19, RPL6, RPL21, RPL10A, ETF1	37	92	8857	15.6116	0.00231037	0.00115585	0.0330676
REACTOME_PATHWAY	R-HSA-975957:R-HSA-975957	6	8.95522	7.16211e-05	RPL17, RPL19, RPL6, RPL21, RPL10A, ETF1	37	109	8857	13.1768	0.00521488	0.00174132	0.0747324
REACTOME_PATHWAY	R-HSA-156902:R-HSA-156902	5	7.46269	0.000402493	RPL17, RPL19, RPL6, RPL21, RPL10A	37	87	8857	13.7574	0.0289603	0.00732006	0.419323
REACTOME_PATHWAY	R-HSA-192823:R-HSA-192823	5	7.46269	0.000402493	RPL17, RPL19, RPL6, RPL21, RPL10A	37	87	8857	13.7574	0.0289603	0.00732006	0.419323
REACTOME_PATHWAY	R-HSA-2408557:R-HSA-2408557	5	7.46269	0.000458051	RPL17, RPL19, RPL6, RPL21, RPL10A	37	90	8857	13.2988	0.0328923	0.00666676	0.477079
REACTOME_PATHWAY	R-HSA-72689:R-HSA-72689	5	7.46269	0.000682924	RPL17, RPL19, RPL6, RPL21, RPL10A	37	100	8857	11.9689	0.0486474	0.0082773	0.710539
REACTOME_PATHWAY	R-HSA-1799339:R-HSA-1799339	5	7.46269	0.000976857	RPL17, RPL19, RPL6, RPL21, RPL10A	37	110	8857	10.8808	0.0688598	0.0101404	1.01495
REACTOME_PATHWAY	R-HSA-156827:R-HSA-156827	5	7.46269	0.000976857	RPL17, RPL19, RPL6, RPL21, RPL10A	37	110	8857	10.8808	0.0688598	0.0101404	1.01495
REACTOME_PATHWAY	R-HSA-72706:R-HSA-72706	5	7.46269	0.00101046	RPL17, RPL19, RPL6, RPL21, RPL10A	37	111	8857	10.7828	0.071143	0.00918265	1.04969
